# Supplementary material for: Self-powered thin-film motion vector sensor
Source: PubMed Central journal article supplement (PMC4557336; doi:10.1038/ncomms9031), 2015-08-14
Supplement: ncomms9031-s1.pdf [file ncomms9031-s1.pdf]

## Supplementary Figures

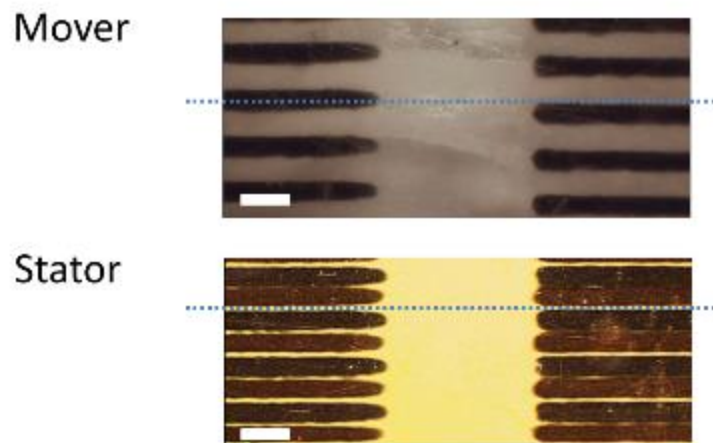

**Supplementary Figure 1. Microscopy view of the electrodes on thin films from mover and stator.**

Electrodes on the mover has a one-fourth pitch shift; Electrodes on the stator are fully aligned. (Scale bar, 1 mm)

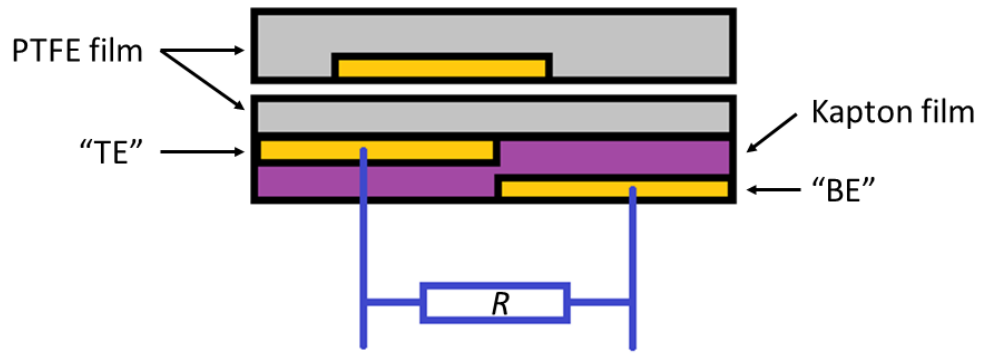

**Supplementary Figure 2. Electric connection between top electrode (TE) and bottom electrode (BE).**

An external load  $R$  is connected between the TE and the BE.

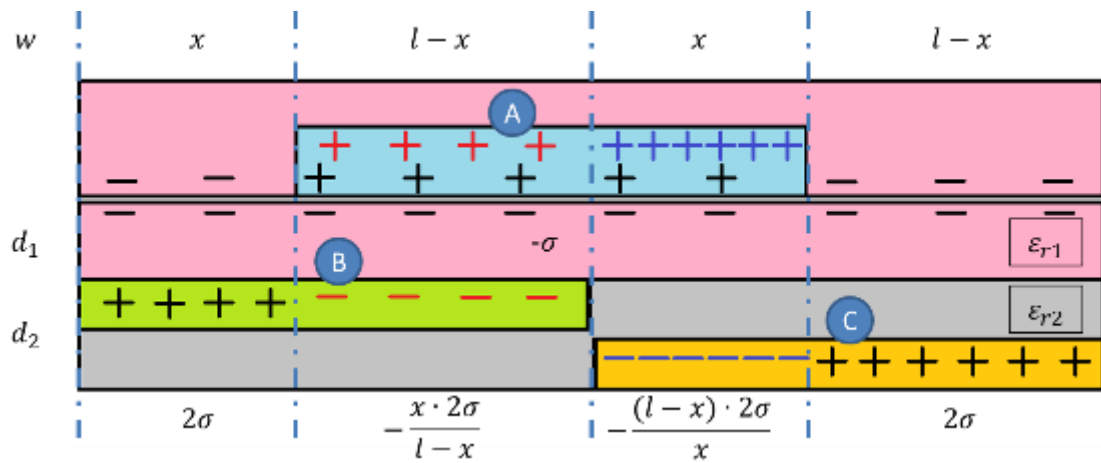

**Supplementary Figure 3. Theoretical derivation of output signal differential equations.** Detailed derivation is presented in Supplementary Note 1.

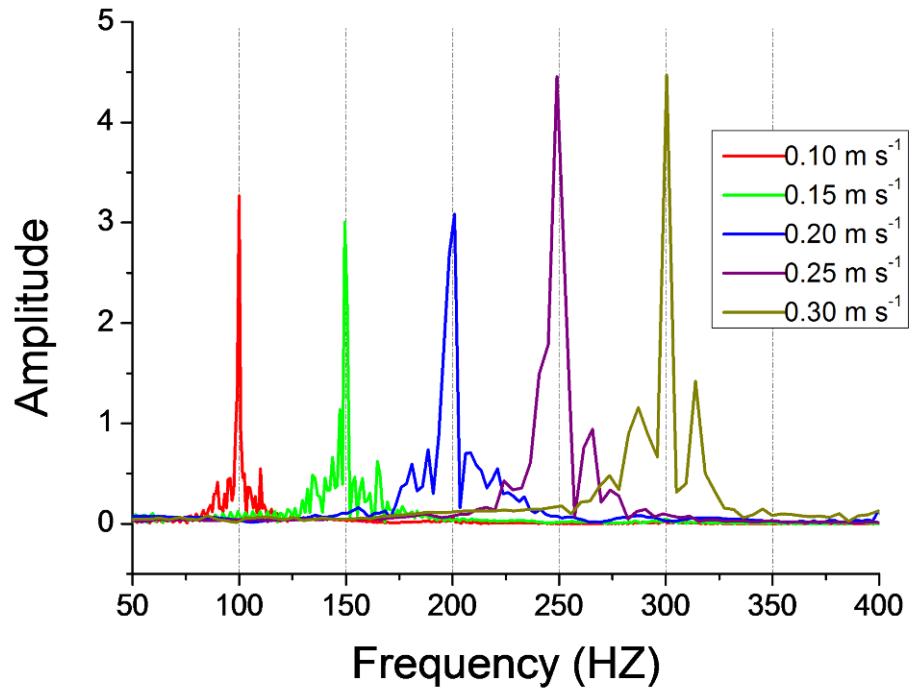

**Supplementary Figure 4. FFT toward outputs over varies velocities.** The amplitude on y-axis is defined as the spectrum compared with the mean value. Dominant frequencies of these outputs show a great linear relationship with driven velocity.

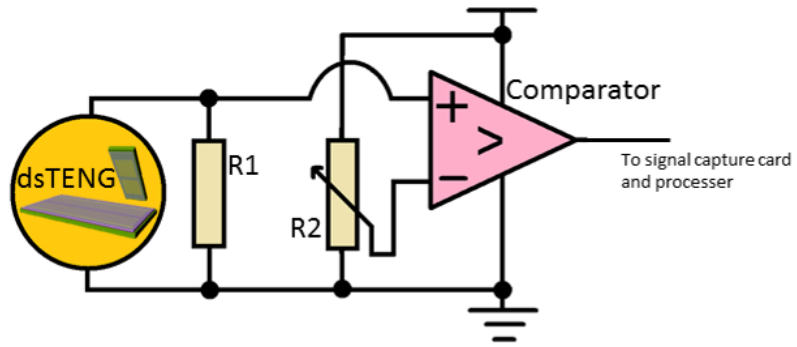

**Supplementary Figure 5. Circuit connection between dsTENG channels and comparator.** Each of base channel and reference channel has to be connected to an individual comparator.

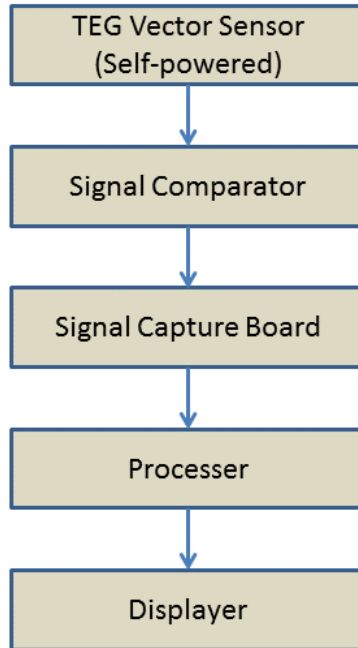

**Supplementary Figure 6. Data flow chart for whole signal processing.** The signal is proceeded in a consequent approach.

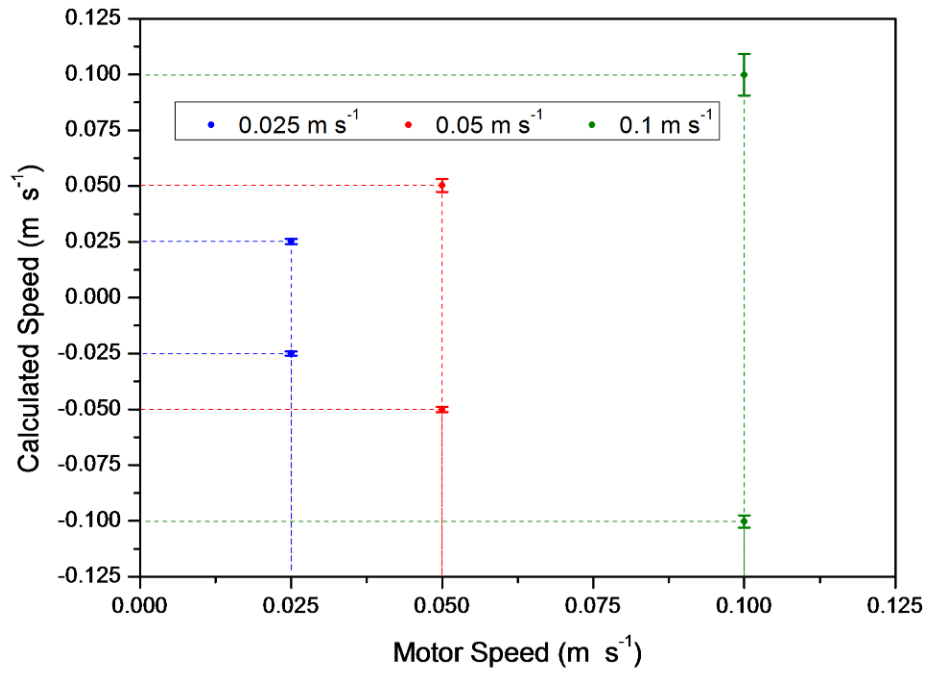

**Supplementary Figure 7. Error diagram on repeating measurement of constant velocity.** The velocities are measured under several different driven speed. Error bar shows the standard deviation in different tests.

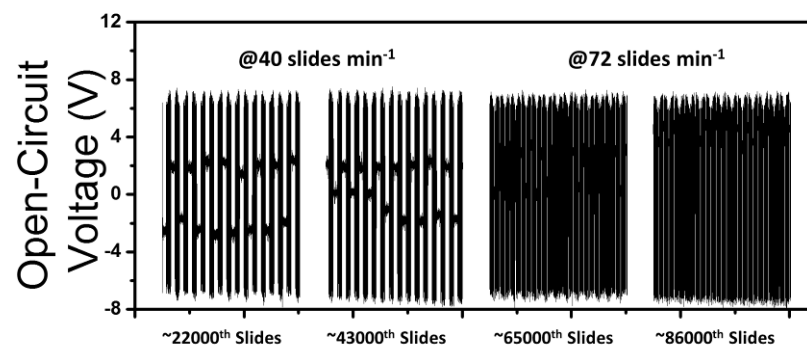

**Supplementary Figure 8. Durability test of the device in continuously reciprocating motion and with open-circuit voltage monitored.** The first 43000 slides were under 40 slides min<sup>-1</sup> and the following 43000 slides were under 72 slides min<sup>-1</sup> compositing a total length of 28 hours.



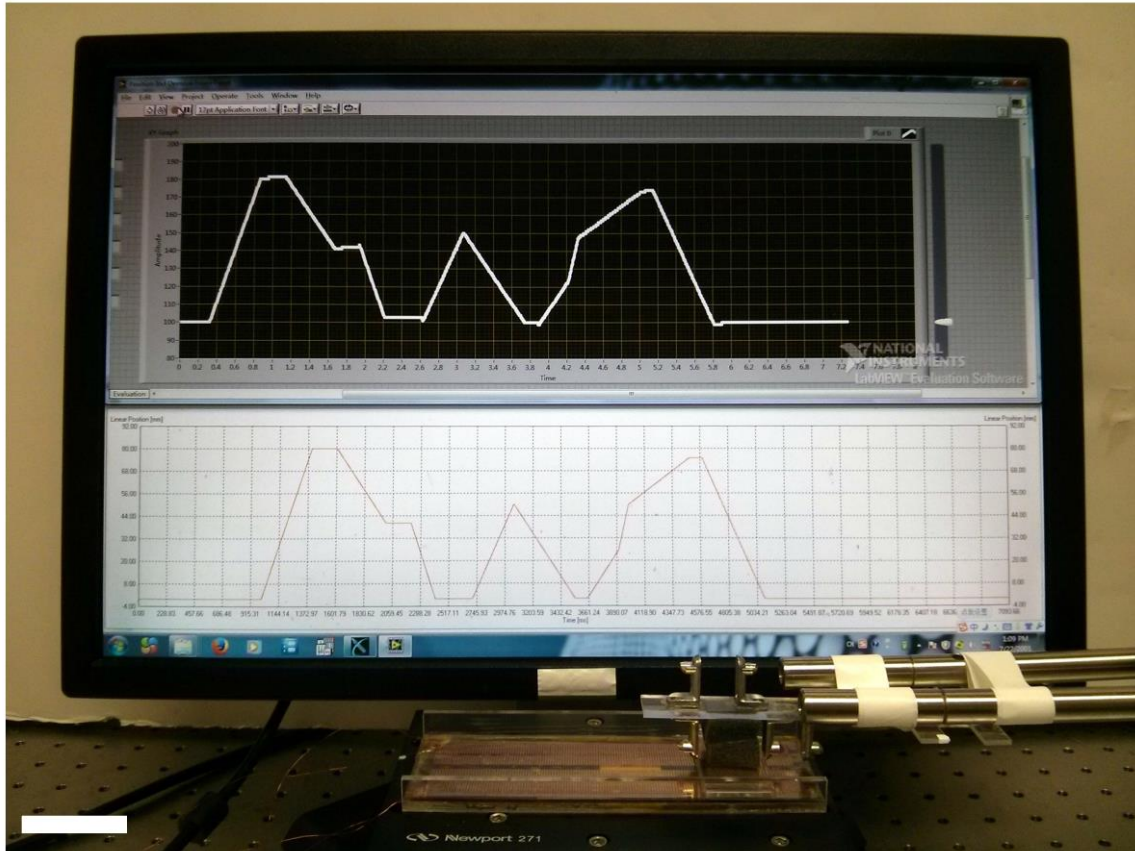

**Supplementary Figure 9. dsTENG in recording motion from programed linear motor.** Bottom window shows the working curve of the programmable linear motor. Top window shows the real-time measured displacement curve. (Both charts have y-axis as displacement and x-axis as time, scale bar, 5 cm)

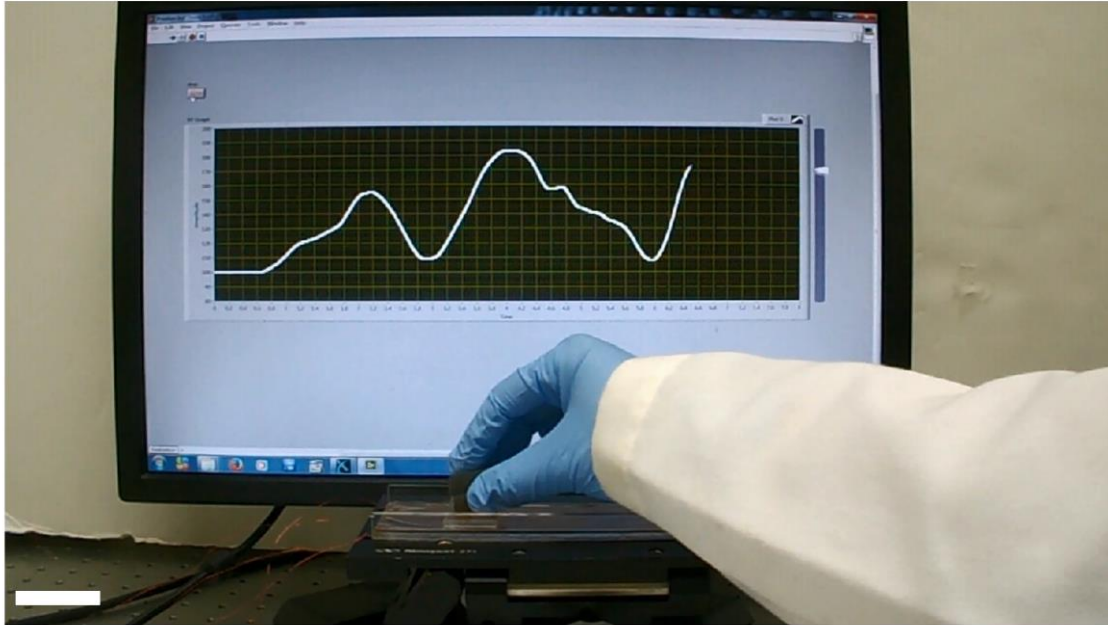

**Supplementary Figure 10. dsTENG in recording motion from random driven.** Window shows the real-time measured displacement curve. (Chart has y-axis as displacement and x-axis as time, scale bar, 5 cm)

## Supplementary Tables

**Supplementary Table 1. Comparison of durability performance test results for triboelectric nanogenerators.**

| System                                                             | Mode     | Durability Data       | Total Signal cycles | Comment                                                                                                                                            |
|--------------------------------------------------------------------|----------|-----------------------|---------------------|----------------------------------------------------------------------------------------------------------------------------------------------------|
| Freestanding Triboelectric Layer-Based Nanogenerators <sup>1</sup> | Sliding  | 20,000 slides         | 20,000              | Test was conducted with the mover in a gap-contact with the stator.                                                                                |
| Cylindrical Rotating TENG <sup>2</sup>                             | rotating | 20,000 rotary cycles  | 120,000             | The TENG generates 6 AC signal cycles per rotary cycle.                                                                                            |
| Noncontact Free-Rotating Disk TENG <sup>3</sup>                    | rotating | 500,000 rotary cycles | 4,000,000           | Test was conducted with the mover in a gap-contact with the stator. The TENG generates 8 AC signal cycles per rotary cycle.                        |
| Radially Arrayed Rotary TENG <sup>4</sup>                          | rotating | 166,000 rotary cycles | 10,000,000          | Test was conducted over 10 million AC output cycles at 60 AC signal cycles per rotary cycle.                                                       |
| Thin-Film Motion Vector Sensor (our work)                          | sliding  | 86,000 slides         | 12,900,000          | Since 1 slide covers 15 cm distance and generates 150 AC signal cycles, the total number AC signal cycles during the test is approx. 12.9 million. |

**Remark:** As can be seen from the Table, our 86,000-cycle test seems comparable to similar durability tests sourced from published data. Further, if the stability of a “continuously generating AC signals” is considered, our device appears to be among the best performer.

**Supplementary Table 2. Characteristic comparison with commercial kinematic sensors**

| Kinematic Sensor   | Power Source          | Structural Configuration | Installation                                                                | No. of Wired Connections                                                                | Wires in Mover                                                                     |
|--------------------|-----------------------|--------------------------|-----------------------------------------------------------------------------|-----------------------------------------------------------------------------------------|------------------------------------------------------------------------------------|
| Commercial Sensors | External Power Supply | Bulky and Rigid          | Connected to moving objects and require a large space                       | $\geq 3$ for velocity sensing<br>$\geq 4$ for direction sensing                         | Most have a wire connected mover and constitutes a major source of fatigue failure |
| Our Sensor         | Self-Powered          | Thin-Film and Flexible   | Can be attached to the gap between the moving objects, such as in a bearing | 2 for velocity sensing<br>3 for direction sensing (one common ground for both channels) | No wires are connected to the mover                                                |

## Supplementary Note

### Supplementary Note 1 (Please refer to Supplementary Figure 3)

The output can be theoretically derived by utilizing electrostatic theories. Supplementary Figure 3 shows an instant status of one unit (with length marked as  $2l$ ) of the intersection of TEVS with charge distribution. The copper electrode in the mover is assigned with mark A, while the two electrodes for output in the stator are marked as B and C. The relative permittivity of PTFE (pink) and Kapton (gray) were set as  $\epsilon_{r1}$  and  $\epsilon_{r2}$ . A pre-applied charge density on the surface of PTFE between mover and stator is given as  $-\sigma$ . Relatively, considering the local contact area distribution between copper and PTFE is approximately 1:3, the copper electrode A should carry a total charge amount of  $3l\sigma$  in order to balance the negative charge on PTFE. Under open circuit condition, as electrode A has a  $x$  mismatch from electrode B, charges redistribute as shown in Supplementary Figure 3. The voltage between A and B, as well as A and C can be described as following,

$$U_A - U_B = \frac{x \cdot 2\sigma \cdot d_1}{(l-x)\epsilon_0\epsilon_{r1}} \quad (1)$$

$$U_A - U_C = \frac{(l-x) \cdot 2\sigma \cdot d_1}{x\epsilon_0\epsilon_{r1}} + \frac{(l-x) \cdot 2\sigma \cdot d_2}{x\epsilon_0\epsilon_{r2}} \quad (2)$$

Where  $d_1$ ,  $d_2$  are thickness of PTFE film and Kapton film in stator.  $\epsilon_0$  is the permittivity in vacuum. The open circuit voltage output therefore can be calculated as,

$$U_{BC}^0 = U_C - U_B = \frac{x \cdot 2\sigma \cdot d_1}{(l-x)\epsilon_0\epsilon_{r1}} - \frac{(l-x) \cdot 2\sigma \cdot d_1}{x\epsilon_0\epsilon_{r1}} - \frac{(l-x) \cdot 2\sigma \cdot d_2}{x\epsilon_0\epsilon_{r2}} \quad (3)$$

Or

$$U_{BC}^0 = \frac{2\sigma}{\epsilon_0} \left[ \frac{x \cdot d_1}{(l-x)\epsilon_{r1}} - \frac{(l-x) \cdot d_1}{x\epsilon_{r1}} - \frac{(l-x) \cdot d_2}{x\epsilon_{r2}} \right] \quad (4)$$

As there is electronic load between B and C, a general voltage description  $V^{BC}$  using capacitor  $C$  and charge  $Q$  can be raised up using the following equations

$$V^{BC} = -\frac{1}{C_{BC}} \times Q^{BC} + U_{BC}^0 \quad (5)$$

$$V^{BC} = -\frac{1}{\epsilon_0 w} \left[ \frac{d_1}{(l-x)\epsilon_{r1}} + \frac{d_1}{x\epsilon_{r1}} + \frac{d_2}{x\epsilon_{r2}} \right] \times Q^{BC} + \frac{2\sigma}{\epsilon_0} \left[ \frac{x \cdot d_1}{(l-x)\epsilon_{r1}} - \frac{(l-x) \cdot d_1}{x\epsilon_{r1}} - \frac{(l-x) \cdot d_2}{x\epsilon_{r2}} \right] \quad (6)$$

Under open-circuit condition, charge transfer is zero,

$$V_{OC} = \frac{2\sigma}{\epsilon_0} \left[ \frac{x \cdot d_1}{(l-x)\epsilon_{r1}} - \frac{(l-x) \cdot d_1}{x\epsilon_{r1}} - \frac{(l-x) \cdot d_2}{x\epsilon_{r2}} \right] \quad (7)$$

Since

$$C_{BC} = \frac{1}{\frac{1}{C_{BA}} + \frac{1}{C_{CA}}} \quad (8)$$

$$C_{BA} = \frac{\epsilon_0 \epsilon_{r1} (l-x) w}{d_1} \quad (9)$$

$$C_{CA} = \frac{1}{\frac{d_1}{\epsilon_0 \epsilon_{r1} x w} + \frac{d_2}{\epsilon_0 \epsilon_{r2} x w}} \quad (10)$$

$$C_{BC} = \frac{1}{\frac{d_1}{\varepsilon_0 \varepsilon_{r1} (l-x) w} + \frac{d_1}{\varepsilon_0 \varepsilon_{r1} x w} + \frac{d_2}{\varepsilon_0 \varepsilon_{r2} x w}} \quad (11)$$

Combining the results with Ohm's law

$$V^{BC} = I \cdot R \quad (12)$$

And definition of current, the output must satisfy the following equations,

$$I = \frac{dQ^{BC}}{dt} \quad (13)$$

$$x = vt \quad (14)$$

$$R \cdot \frac{dQ^{BC}}{dt} = -\frac{1}{\varepsilon_0 w} \left[ \frac{d_1}{(l-vt)\varepsilon_{r1}} + \frac{d_1}{vt\varepsilon_{r1}} + \frac{d_2}{vt\varepsilon_{r2}} \right] \times Q^{BC} + \frac{2\sigma}{\varepsilon_0} \left[ \frac{vt \cdot d_1}{(l-vt)\varepsilon_{r1}} - \frac{(l-vt) \cdot d_1}{vt\varepsilon_{r1}} - \frac{(l-vt) \cdot d_2}{vt\varepsilon_{r2}} \right] \quad (15)$$

## Supplementary References

- 1 Wang, S. H. *et al.* Freestanding triboelectric-layer-based nanogenerators for harvesting energy from a moving object or human motion in contact and non-contact modes. *Adv. Mater.* **26**, 2818-2824 (2014).
- 2 Bai, P. *et al.* Cylindrical rotating triboelectric nanogenerator. *ACS Nano* **7**, 6361-6366 (2013).
- 3 Lin, L. *et al.* Noncontact free-rotating disk triboelectric nanogenerator as a sustainable energy harvester and self-powered mechanical sensor. *ACS Appl. Mater. Interfaces* **6**, 3031-3038 (2014).
- 4 Zhu, G., Chen, J., Zhang, T. J., Jing, Q. S. & Wang, Z. L. Radial-arrayed rotary electrification for high performance triboelectric generator. *Nat. Commun.* **5**, 3426 (2014).
